# Supplementary material for: haCCA: Multi-module Integrating of spatial transcriptomes and metabolomes.
Source: Research Square preprint supplement (doi:10.21203/rs.3.rs-5047159/v1), 2025-03-27
Supplement: Supplementary file 1 [file 7a4cf0dd2c0c7fbe1fa73ced.xlsx]

## Sheet: Sheet1
samples used for haCCA from Macro et al’s manuscript
ID	Sample.ID	protocal	Matrix	10X Visium	MSI-MALDI
m3	V11L12-038_C1	Visium_iCtrl	nM	yes	no
m3	V11L12-038_D1	Sma	9-AA	yes	yes
m1	V11T16-085_A1	Sma	FMP-10	yes	yes
m1	V11T17-101_A1	Visium_iCtrl	nM	yes	no
m4	V11T16-085_C1	Sma	FMP-10	yes	yes
m4	V11T16-085_D1	Visium_iCtrl	nM	yes	no
